# Supplementary material for: Perioperative Clinical Features and Long-term Prognosis After Oblique Lateral Interbody Fusion (OLIF), OLIF With Anterolateral Screw Fixation, or OLIF With Percutaneous Pedicle Fixation: A Comprehensive Treatment Strategy for Patients With Lumbar Degenerative Disease
Source: PubMed Central journal article supplement — Neurospine. 2023 Jun 27;20(2):536–49. doi: 10.14245/ns.2244954.477 (PMC10323359; doi:10.14245/ns.2244954.477), 2023-06-27
Supplement: ns-2244954-477-Supplementary-Table-2.pdf [file ns-2244954-477-Supplementary-Table-2.pdf]

**Supplementary Table 2.** Subgroup analysis of prognosis in male and female patients

| Group   | No. | Prognosis evaluation               |         |                               |         |                |         |                     |         |
|---------|-----|------------------------------------|---------|-------------------------------|---------|----------------|---------|---------------------|---------|
|         |     | Delta VAS of low back <sup>†</sup> | p-value | Delta VAS of leg <sup>†</sup> | p-value | Fused (yes/no) | p-value | Subsidence (yes/no) | p-value |
| Male    |     |                                    |         |                               |         |                |         |                     |         |
| OLIF    | 7   | 4.5 (3.0–6.0)                      | 0.272   | 3.0 (1.0–5.0)                 | 0.865   | 5/2            | 0.640   | 4/3                 | 0.620   |
| OLIF-AF | 1   | NA                                 |         | NA                            |         | 1/0            |         | 0/1                 |         |
| OLIF-PF | 15  | 3.0 (0–5.0)                        |         | 3.0 (0–6.0)                   |         | 13/2           |         | 5/10                |         |
| Female  |     |                                    |         |                               |         |                |         |                     |         |
| OLIF    | 18  | 4.0 (2.0–5.0)                      | 0.310   | 3.0 (0–4.0)                   | 0.375   | 16/2           | 0.660   | 13/5                | 0.111   |
| OLIF-AF | 18  | 4.0 (0–6.0)                        |         | 3.0 (0–5.0)                   |         | 16/2           |         | 10/8                |         |
| OLIF-PF | 12  | 4.0 (2.0–4.0)                      |         | 2.0 (0–4.0)                   |         | 12/0           |         | 4/8                 |         |

Values are presented as median (range).

VAS, visual analogue scale; OLIF, oblique lateral interbody fusion; OLIF-AF, OLIF combined with anterolateral screw fixation; OLIF-PF, OLIF combined with percutaneous pedicle screw fixation.

<sup>†</sup>The delta VAS of low back/leg was calculated as the pre-VAS score minus follow-up VAS.
